# Supplementary material for: Protein prediction for trait mapping in diverse populations
Source: PubMed Central journal article supplement (PMC8870552; doi:10.1371/journal.pone.0264341), 2022-02-24
Supplement: pone.0264341.s020.pdf [file pone.0264341.s020.pdf]

**We thank the editor and reviewers for the thorough examination of our manuscript and for providing positive and helpful feedback. We appreciate the opportunity to address reviewer comments here. Our responses are prefaced by RESPONSE:**

Reviewer #1: Review: Protein prediction for trait mapping in diverse populations

Overview: Schubert et al present work on predicting protein abundance in the TOPMed data using genotype information into large-scale GWAS across diverse populations. Their work builds conceptually on the TWAS model, which predicts steady state gene expression (mRNA levels) rather than downstream protein abundance. They investigated the predictive performance and transferability of prediction models across four TOPMed MESA populations (African Americans, Chinese, European, and Hispanic/Latino). Particular attention was paid to the performance of fine-mapping or baseline prediction models across populations, and follow-up with out-of-sample performance in the INTERVAL protein study. Next, they applied their prediction models to GWAS data for 28 phenotypes of diverse populations in the PAGE consortium.

I find this area to be interesting and useful, however I find the results as presented to provide very little insight and lack clear take-aways for downstream decision making. For example, the authors performed a good deal of analyses to quantify protein prediction accuracy, but fail to provide a clear recommendation on which approach to use (e.g., does having more models matter upfront, or having population matched model/GWAS downstream). I appreciate the complexity of multiple analyses across diverse populations complicates matters, but simple meta-analysis tools can simplify the big picture and present results in a consistent manner that help the reader understand what approaches work better on average. Similarly, there are a number of analyses that should have been performed to help place findings in context prior to predictive modeling. Overall, I think the data generated in this manuscript to be interesting and valuable to the broader community, but that a simplified presentation could greatly help with communicating primary findings and informing downstream TWAS/PWAS users.

**RESPONSE: Thank you for your helpful recommendations. We have updated our results as described in our responses to your Major Comments below and have added clearer recommendations to our Discussion, lines 322-327:**

**“Given the improved cross-population prediction of fine-mapped models (S7 Fig, S5 Table, S6 Table) and similar performance to baseline models in PWAS (Fig 5), we recommend using our fine-mapped models in PWAS. We also recommend population-matching in PWAS when protein model training sample sizes are within the same order of magnitude, as in TOPMed MESA, to maximize PWAS discovery, colocalization, and replication.”**

I provide more details below.

Major Comments:

1. Given that protein prediction models rely on pQTL signals, it would greatly help if the authors also discussed raw pQTL association (and fine-mapping) results across populations before discussing prediction. Understanding functional enrichment of protein regulatory mechanisms is interesting and crucially unexplored in data at this scale. Including these analyses would help provide context for downstream prediction models and shed light on regulatory mechanisms themselves, prior to their relationship with complex disease risk.

**RESPONSE:** Thank you for your suggestion. We have added more details about our cis-pQTL mapping to the beginning of the Results (lines 49-60). We added Table 1, which summarizes pQTL counts (FDR < 0.05) and added all pQTL summary statistics to the zenodo repository with the prediction models. We found that effect sizes were enriched near the transcription start site (TSS) for each gene region which mapped to a protein in our sample and that as sample size increased, smaller effect size SNP associations farther from the TSS were discovered (S2 Fig).

2. Similarly, prediction accuracy is inherently tied to heritability. It would be helpful to see how prediction accuracy tracks with in-sample h2g estimates (or out-of-sample INTERVAL R2 with INTERVAL h2g).

**RESPONSE:** We agree, thank you for the suggestion. We estimated heritability of each protein trait using Bayesian Sparse Linear Mixed Modeling (Zhou et al. 2013), as we have done previously for gene expression traits (Wheeler et al. 2016, Mogil et al. 2018). This analysis is added to the Results (lines 113-119):

**“As the heritability of a trait determines the ceiling for genetic prediction performance, we estimated the proportion variance explained (PVE) by SNPs within 1Mb of each protein encoding gene using Bayesian Sparse Linear Mixed Modeling (BSLMM) [35]. Highly heritable proteins (high PVE) were associated with high predictive performance in INTERVAL across populations, despite larger credible sets surrounding the PVE estimates in the smaller populations, i.e., CHN and AFA. (S5 Fig).”**

**We added a description of our BSLMM analysis to the Methods (lines 501-506):**

**“We used the software GEMMA to implement BSLMM for each protein aptamer with 100K sampling steps per aptamer. BSLMM estimates the PVE (the proportion of variance in phenotype explained by the additive genetic model, analogous to h2). From the second half of the sampling iterations for each aptamer, we compared the median and the 95% credible sets of the PVE to model performance in INTERVAL.”**

3. Can the authors provide some supporting analyses for when genes fail to replicate across populations? It would be interesting to see how avg Fst at a gene/locus tracks with avg cross-pop R2.

**RESPONSE:** Thank you for the suggestion. We have taken your advice and believe our results make our paper stronger. We added a new figure (now Fig 4) and the following to the Results (lines 145-164):

**“When we compared all five TOPMed MESA training populations within each model building strategy, we observed the largest and most significant differences between populations in the baseline models rather than the fine-mapped models (S7 Fig, S5 Table, S6 Table). To test the hypothesis that allele frequency differences between populations influence predictive power, we performed a fixation index (FST) analysis. For each model set, we calculated the (FST) between INTERVAL and the corresponding TOPMed population for SNPs in the predictive model. We then compared the difference in average (FST) between protein models that had a large difference in predictive performance between populations and protein models that had a small difference (Fig 4). We tested multiple thresholds for differences in predictive performance in both fine-mapped and baseline model sets. We found that models which had minimal differences in their performance had significantly smaller differences in average FST than models which had larger differences in performance by Wilcoxon signed-rank test (Fig 4). This effect was observed for multiple thresholds in both baseline and fine-mapped model sets, but was attenuated in fine-mapped sets. Thus, performance differences between populations in the fine-mapped models are less likely due to allele frequency differences. As sample sizes in proteomics studies increase, allowing identification of SNPs with higher PIP values, including trans-acting pQTLs, we anticipate increased cross-population performance benefit from multi-ancestries fine-mapping.”**

Reviewer #2: The authors took up an exploratory study that constructed pQTL models using TOPMed MESA cohorts of various ancestries, including African American, Chinese, European, Hispanic/Latino, and cross-population; models were further evaluated and validated using an independent cohort European INTERVAL. For each population-specific cohort or cross-population cohort, the authors have also developed a baseline model (which I believe was inclusive of all sequenced or genotyped variants) and a fine-mapped model. In general, fine-mapped models outperformed baseline models in terms of significant pQTL signals/models. Furthermore, the authors used the constructed models to perform PWAS on the PAGE cohort and replicated in the UKB+ data when the testing trait is available in the replication cohort. The authors successfully identified several known associations, for example, HDL-APOE.

1. In line 86-90, the authors stated that they identified 372 protein aptamers distinct to MESA and not found in GTEx Whole Blood models. Can there be false positives? Are these protein aptamers population-specific or from the cross-population model? It would explain the distinctiveness of these aptamers if these were population specific.

**RESPONSE:** Thank you for your questions. The cross-validated prediction performance of all models with  $R^2 > 0.01$  is listed in S3 Table along with columns indicating whether or not the gene has a GTEx whole blood or any tissue transcription model (mashr method in

Barbeira et al. 2020). We note many proteins (254/372) that do not have a mashr transcript model in GTEx do have a significant protein aptamer model trained in the MESA EUR population, which is the closest ancestry to GTEx, therefore most aptamers are not population-specific. Yes, we agree that some of the models listed in S3 Table may be false positives, which is why we go on to test them in the independent INTERVAL cohort.

2. For table 1, are these all replication of previous findings? Are some of them novel? There was analysis in the result saying that some significant association signals of APOE isoforms went away after adjusted for PAV. Would it be better if this is noted in the table 1 or at least stated in the table 1 legend?

**RESPONSE:** Thank you for the suggestion. Yes, the APOE associations were no longer significant after adjusting for PAVs. We agree that this should be noted in what is now Table 2 and have added a footer indicating which associations are no longer significant after PAV adjustment.

We also discuss in lines 221-227 that “Three of our protein-trait associations were not found in the original PAGE GWAS, but are still supported by independent GWAS. Increased Haptoglobin, Mixed Type was associated with decreased LDL cholesterol and decreased total cholesterol, both of which are corroborated by GWAS at this locus (Klarin et al. 2018). Increased IL-1Ra was associated with decreased C-reactive protein. SNPs near IL-1Ra associated with C-reactive protein in an independent GWAS (Han et al. 2020). The directions of effect for each protein-phenotype association were consistent between all training populations.”

3. Were there any related samples in MESA? Did the authors adjust for relatedness among samples?

**RESPONSE:** Yes, we adjusted for cryptic relatedness using PCAIR, as described in the Methods, lines 431-442. No close relatives (1st-2nd degree) were identified.

Minor suggestions or side questions

1. What the relationships between pQTLs in this study and MESA eQTLs? Is it correlated?

We agree this would be a useful analysis, but it would be a significant project beyond the scope of this paper due to differences in tissues, timing, samples, and harmonization issues. For example, the protein data come from plasma, while TOPMed MESA has RNA-Seq data in PBMCs, monocytes, and T-cells taken at different exam timepoints. We note there are other ongoing TOPMed proposed papers performing such integrative analyses.

2. Some acronyms, like PIP, were declared more than once.

Thank you, we have edited our manuscript so acronyms are declared upon first use and not again.
