# Supplementary material for: Protein prediction for trait mapping in diverse populations
Source: PLoS One. 2022 Feb 24;17(2):e0264341. doi: 10.1371/journal.pone.0264341 (PMC8870552; doi:10.1371/journal.pone.0264341)
Supplement: S2 Table — Sources for GWAS summary statistics comprising our UKB+ data. Where possible we use GWAS summary statistics generated using the UKB. However, when a phenotype is not available, we sourced data from the GWAS catalogue for other large European GWAS. (XLSX) [file pone.0264341.s013.xlsx]

## Sheet: replication studies
PAGE Phenotype	PAGE N or N Cases/N Controls	Replication Study	Replication N or N Cases/N Control
C-reactive protein (CRP) (mg/L)	28520	UKBB (http://www.nealelab.is/uk-biobank/)	343524
White blood cell (WBC) count (109 cells/L)	28608	UKBB (http://www.nealelab.is/uk-biobank/)	350470
Mean corpuscular hemoglobin concentration (MCHC) (g/dL)	19803	UKBB (http://www.nealelab.is/uk-biobank/)	350468
Platelets (per mcL)	29328	UKBB (http://www.nealelab.is/uk-biobank/)	350474
HDL cholesterol (mg/dL)	33063	UKBB (http://www.nealelab.is/uk-biobank/)	315133
LDL cholesterol (mg/dL)	32221	UKBB (http://www.nealelab.is/uk-biobank/)	343621
Triglycerides (mg/dL)	33096	UKBB (http://www.nealelab.is/uk-biobank/)	343992
Total Cholesterol (mg/dL)	33185	UKBB (http://www.nealelab.is/uk-biobank/)	344278
Cigarettes/day exclude nonsmokers	15862	UKBB (http://www.nealelab.is/uk-biobank/)	25348
Coffee (cups/day)	35902	UKBB (http://www.nealelab.is/uk-biobank/)	51427
HbA1c (mmol/mol)	11178	Wheeler E., Leong A. et al, Impact of common genetic determinants of Hemoglobin A1c on type 2 diabetes risk and diagnosis in ancestrally diverse populations: A transethnic genome-wide meta-analysis. PLoS Med. 2017 Sep 12;14(9):e1002383. doi: 10.1371/journal.pmed.1002383.	88355
Fasting insulin (pmol/L)	21551	Manning, A. K. et al. A genome-wide approach accounting for body mass index identifies genetic variants influencing fasting glycemic traits and insulin resistance. Nature Genetics 44, 659–669 (2012).	51750
Fasting glucose (mmol/L)	23911	Manning, A. K. et al. A genome-wide approach accounting for body mass index identifies genetic variants influencing fasting glycemic traits and insulin resistance. Nature Genetics 44, 659–669 (2012).	58074
Type 2 diabetes (cases/controls)	14,042/31,683	UKBB (http://www.nealelab.is/uk-biobank/)	361194
QT interval (ms)	17348	Gondalia R, Avery CL, Napier MD, Méndez-Giráldez R, Stewart JD, Sitlani CM, Li Y, Wilhelmsen KC, Duan Q, Roach J, North KE, Reiner AP, Zhang ZM, Tinker LF, Yanosky JD, Liao D, Whitsel EA. Genome-wide Association Study of Susceptibility to Particulate Matter-Associated QT Prolongation. Environ Health Perspect. 2017 Jun 8;125(6):067002. doi: 10.1289/EHP347. Erratum in: Environ Health Perspect. 2017…	22158
QRS interval (ms)	17046	UKBB (http://www.nealelab.is/uk-biobank/)	10815
PR interval (ms)	17422	UKBB (http://www.nealelab.is/uk-biobank/)	10785
Systolic blood pressure (mm Hg)	35433	UKBB (http://www.nealelab.is/uk-biobank/)	340159
Diastolic blood pressure (mm Hg)	35433	UKBB (http://www.nealelab.is/uk-biobank/)	340162
Hypertension (cases/controls)	27,123/22,018	Zhaozhong Zhu et al, Genetic overlap of chronic obstructive pulmonary disease and cardiovascular disease-related traits: a large-scale genome-wide cross-trait analysis, Respiratory Research, 2019	Ncase = 144,793, Ncontrol = 313,761
WHR-male	9066	Meta-analysis of genome-wide association studies for body fat distribution in 694,649 individuals of European ancestry." Pulit, SL et al. bioRxiv, 2018. https://www.biorxiv.org/content/early/2018/04/18/304030	315284
WHR-female	24838	Meta-analysis of genome-wide association studies for body fat distribution in 694,649 individuals of European ancestry." Pulit, SL et al. bioRxiv, 2018. https://www.biorxiv.org/content/early/2018/04/18/304030	379501
WHR	33904	Meta-analysis of genome-wide association studies for body fat distribution in 694,649 individuals of European ancestry." Pulit, SL et al. bioRxiv, 2018. https://www.biorxiv.org/content/early/2018/04/18/304030	694649
Height (cm)	49796	UKBB (http://www.nealelab.is/uk-biobank/)	360388
BMI (kg/m2)	49335	UKBB (http://www.nealelab.is/uk-biobank/)	359983
Chronic kidney disease (cases/controls)	4,154/41,573	Pattaro C, Teumer A, Gorski M, et al. Genetic Associations at 53 Loci Highlight Cell Types and Biologic Pathways for Kidney Function. Nature Communications. 2015 – full reference to be provided when published	118147
End-stage renal disease (cases/controls)	602/32,459	Genome-Wide Association Study of Diabetic Kidney Disease Highlights Biology Involved in Glomerular Basement Membrane Collagen	2187 cases + 12,101
eGFR (mL/min)	27900	A catalog of genetic loci associated with kidney function from analyses of a million individuals.	765348
